# Supplementary material
Source: publisher site journal article supplement (https://www.spandidos-publications.com/5957/downloadSupplementary)
Supplement: Supplementary file 1 [file downloadSupplementary]

## Sheet: Sheet1
Table SII. Identified DEGs between knub tissues and neighbor standard tissues.
gene_id	gene_name	CON_1_fpkm	CON_2_fpkm	CON_3_fpkm	LC_1_fpkm	LC_2_fpkm	LC_3_fpkm	LCvsControl_LC	LCvsControl_Control	LCvsControl_log2FoldChange	LCvsControl_pvalue	LCvsControl_padj	Label	Label in TCGA	OS
ENSG00000146678	IGFBP1	2.64644	0.708831	1.94738	0.142561	0	0.28206	4.22952	52.8183	-3.63594	0.000103026	0.0158117	down regulation in tumor	up regulation in tumor	S
ENSG00000176435	CLEC14A	76.6242	52.5613	92.6455	15.5664	18.6389	27.3764	841.242	3030.34	-1.84868	5.24e-06	0.00172682	down regulation in tumor	down regulation in tumor	NS
ENSG00000120279	MYCT1	22.1376	12.5929	14.892	7.07736	4.13588	5.02662	296.512	906.023	-1.61166	8.71e-05	0.0142656	down regulation in tumor	down regulation in tumor	NS
ENSG00000178031	ADAMTSL1	0.360489	0.186578	0.268885	0.677511	0.866943	0.755141	189.176	67.1242	1.49807	0.000408181	0.0468428	up regulation in tumor	NS	NS
ENSG00000109881	CCDC34	0.618484	0.92798	0.741289	2.63555	2.33843	1.70694	150.284	51.4618	1.54298	0.000281217	0.0353538	up regulation in tumor	up regulation in tumor	S
ENSG00000126016	AMOT	0.87185	0.910773	0.670888	1.66997	3.55265	2.25451	383.066	125.698	1.60774	0.000198052	0.0265455	up regulation in tumor	down regulation in tumor	NS
ENSG00000109654	TRIM2	3.67449	2.11341	1.7856	9.20734	6.6879	7.47531	1327.3	430.126	1.62607	8.49e-05	0.0142295	up regulation in tumor	up regulation in tumor	NS
ENSG00000135373	EHF	4.76533	6.55085	3.64391	15.1917	22.1617	12.2485	1310.94	395.386	1.72894	3.29e-05	0.00740143	up regulation in tumor	up regulation in tumor	NS
ENSG00000183742	MACC1	1.11105	1.38964	1.58616	5.79728	6.33584	2.17206	853.215	243.756	1.80716	0.000217443	0.0285732	up regulation in tumor	up regulation in tumor	NS
ENSG00000108846	ABCC3	2.5279	2.8031	2.49064	8.24809	13.0571	6.69251	1621.98	453.127	1.83968	2.02e-06	0.000796128	up regulation in tumor	up regulation in tumor	NS
ENSG00000203697	CAPN8	3.1713	3.64021	5.78664	12.5724	21.3722	14.6974	1521.82	394.148	1.94898	2.82e-06	0.00103093	up regulation in tumor	up regulation in tumor	NS
ENSG00000158023	WDR66	0.180973	0.0979984	0.129664	0.314399	0.671299	0.60115	154.093	39.6812	1.96147	9.19e-05	0.0147789	up regulation in tumor	up regulation in tumor	NS
ENSG00000105877	DNAH11	0.220275	0.165587	0.172974	0.72546	0.699641	0.764219	211.054	53.8725	1.97214	1.19e-07	6.28e-05	up regulation in tumor	NS	NS
ENSG00000204385	SLC44A4	3.04511	4.03377	5.84504	6.44691	26.1419	18.8661	1045.52	262.603	1.99326	0.000367557	0.0429636	up regulation in tumor	up regulation in tumor	NS
ENSG00000115107	STEAP3	4.67471	4.81293	3.30526	23.6324	20.0623	8.6758	1439.66	351.676	2.03326	1.51e-05	0.00389086	up regulation in tumor	up regulation in tumor	NS
ENSG00000205213	LGR4	1.90707	2.88465	1.62118	5.86344	15.8805	5.6054	1044.85	244.997	2.09209	7.74e-05	0.0131807	up regulation in tumor	up regulation in tumor	S
ENSG00000141579	ZNF750	0.621816	0.658573	0.471505	1.49147	4.16838	1.88356	168.776	39.1968	2.10631	8.73e-05	0.0142656	up regulation in tumor	up regulation in tumor	NS
ENSG00000182013	PNMA8A	0.509604	0.592685	0.443114	1.45051	3.01388	2.20059	148.439	34.4185	2.10803	8.06e-06	0.00242006	up regulation in tumor	NS	NS
ENSG00000143502	SUSD4	0.773987	0.91936	0.371698	4.57797	2.50148	1.88082	254.308	58.6095	2.11586	8.6e-05	0.0142656	up regulation in tumor	up regulation in tumor	NS
ENSG00000132470	ITGB4	2.3365	3.51126	4.25999	28.4327	9.05378	7.53206	1834.09	411.797	2.15481	0.000187479	0.0256412	up regulation in tumor	up regulation in tumor	S
ENSG00000134317	GRHL1	0.290342	0.749544	0.369298	1.13352	2.72755	2.8795	322.991	67.5246	2.25563	4.96e-05	0.0102813	up regulation in tumor	up regulation in tumor	NS
ENSG00000164626	KCNK5	1.92497	4.86919	1.50357	9.48948	19.6052	11.2685	913.544	187.803	2.28117	4.03e-05	0.00852009	up regulation in tumor	up regulation in tumor	NS
ENSG00000138798	EGF	0.208245	0.299324	0.119824	1.24038	1.39851	0.481946	115.222	23.1636	2.31066	0.000136661	0.0197666	up regulation in tumor	up regulation in tumor	NS
ENSG00000174938	SEZ6L2	4.40532	2.34265	1.44277	6.03466	19.2717	15.3272	1006.34	202.854	2.31132	6.58e-05	0.0120666	up regulation in tumor	up regulation in tumor	NS
ENSG00000182489	XKRX	0.432441	1.51078	0.686666	7.28553	3.28759	2.51958	266.032	53.437	2.31166	0.000197245	0.0265455	up regulation in tumor	up regulation in tumor	NS
ENSG00000183690	EFHC2	0.457653	0.184188	0.170154	2.11228	0.661563	1.48282	85.1324	16.2397	2.39666	0.000315466	0.0377526	up regulation in tumor	NS	S
ENSG00000162004	CCDC78	0.13186	0.3931	0.245125	1.1507	0.813582	2.24859	105.276	19.2438	2.44495	9.64e-05	0.0151435	up regulation in tumor	down regulation in tumor	NS
ENSG00000155265	GOLGA7B	0.413959	0.670515	0.166152	3.26586	3.0683	0.665812	272.403	48.668	2.4827	0.000394624	0.0455973	up regulation in tumor	up regulation in tumor	NS
ENSG00000029993	HMGB3	4.51817	2.87656	3.21733	16.6923	30.2264	13.4377	1442.79	253.676	2.50834	2e-08	1.49e-05	up regulation in tumor	up regulation in tumor	NS
ENSG00000147889	CDKN2A	0.603509	0.859059	0.626186	1.79638	7.2247	2.99174	313.365	54.487	2.52296	1.31e-05	0.00345362	up regulation in tumor	up regulation in tumor	S
ENSG00000164855	TMEM184A	0.264673	0.430783	0.34731	0.664236	4.52176	1.01552	291.668	49.0431	2.57132	0.000305137	0.0373647	up regulation in tumor	up regulation in tumor	NS
ENSG00000172061	LRRC15	0.613717	0.274442	0.152119	1.69599	3.38096	1.37798	231.044	37.2352	2.63709	2.15e-05	0.0051474	up regulation in tumor	up regulation in tumor	NS
ENSG00000143217	NECTIN4	0.433738	1.09102	1.09658	2.99445	9.7872	3.69824	347.767	55.3169	2.65047	1.2e-05	0.00321232	up regulation in tumor	up regulation in tumor	NS
ENSG00000215018	COL28A1	0.156049	0.184717	0.0767891	0.391627	1.80429	0.430469	104.754	16.6542	2.65187	0.000338294	0.040245	up regulation in tumor	up regulation in tumor	NS
ENSG00000156510	HKDC1	0.427973	0.789448	0.530398	7.49729	2.54003	1.22853	289.127	44.8562	2.68591	6.4e-05	0.0120666	up regulation in tumor	up regulation in tumor	NS
ENSG00000150594	ADRA2A	1.54126	1.27868	0.980192	16.4076	4.39017	3.74877	553.937	85.7568	2.69134	1.43e-05	0.0037353	up regulation in tumor	up regulation in tumor	NS
ENSG00000103316	CRYM	0.979967	0.767787	0.298647	6.44899	4.20562	3.0957	313.366	46.637	2.74889	5.13e-07	0.000229302	up regulation in tumor	up regulation in tumor	NS
ENSG00000163082	SGPP2	3.98861	4.23001	2.62395	47.2754	14.6889	11.0722	1468.2	217.96	2.75169	3.35e-06	0.00116001	up regulation in tumor	up regulation in tumor	NS
ENSG00000187017	ESPN	0.096136	0.175869	0.162469	0.65252	1.92586	0.402398	124.87	18.2008	2.77508	5.12e-05	0.0105075	up regulation in tumor	up regulation in tumor	NS
ENSG00000175600	SUGCT	0.361528	0.231804	0.415106	4.30972	1.61207	1.03356	119.742	17.3611	2.78765	2.43e-05	0.00567568	up regulation in tumor	up regulation in tumor	NS
ENSG00000173898	SPTBN2	0.756166	0.301159	0.316283	3.78824	3.81579	1.95034	555.12	79.8083	2.80058	8.32e-08	4.92e-05	up regulation in tumor	up regulation in tumor	S
ENSG00000101443	WFDC2	11.5625	20.3847	22.843	132.533	171.397	85.9543	3246.85	456.277	2.83075	1.49e-10	2.49e-07	up regulation in tumor	up regulation in tumor	NS
ENSG00000132746	ALDH3B2	0.0939072	0.220466	0.226944	2.33103	1.20849	0.36832	76.1779	10.5522	2.8445	0.000220401	0.0287738	up regulation in tumor	up regulation in tumor	NS
ENSG00000165449	SLC16A9	0.589883	0.62112	0.739557	9.52401	2.56345	2.07033	377.85	52.0575	2.85902	5.56e-06	0.00174654	up regulation in tumor	up regulation in tumor	NS
ENSG00000161055	SCGB3A1	27.2908	35.3472	111.413	214.065	109.514	944.859	6466.33	887.288	2.86548	0.000308507	0.0373647	up regulation in tumor	NS	S
ENSG00000171124	FUT3	0.390852	0.819288	0.599436	4.11199	6.02896	3.13263	248.672	33.9012	2.86992	3.36e-09	3.54e-06	up regulation in tumor	up regulation in tumor	NS
ENSG00000060140	STYK1	0.0887237	0.26781	0.164936	1.70339	1.8769	0.257209	79.1773	10.7592	2.87074	0.000391186	0.0454613	up regulation in tumor	up regulation in tumor	S
ENSG00000189057	FAM111B	0.330292	0.224188	0.116954	0.564274	3.74312	0.657117	115.563	15.6295	2.88893	0.000410064	0.0468428	up regulation in tumor	up regulation in tumor	S
ENSG00000188039	NWD1	0.0681525	0.114287	0.0633473	0.442758	0.240289	1.15639	98.8151	13.2038	2.89969	3.81e-05	0.00822956	up regulation in tumor	down regulation in tumor	NS
ENSG00000198691	ABCA4	0.270669	0.0895839	0.0595858	0.91167	1.37496	0.850257	161.237	21.5799	2.90955	3.08e-06	0.0011067	up regulation in tumor	up regulation in tumor	NS
ENSG00000105855	ITGB8	0.593308	0.305875	0.59619	3.12525	7.60065	0.789585	1051.68	136.569	2.9455	3.28e-05	0.00740143	up regulation in tumor	up regulation in tumor	NS
ENSG00000174950	CD164L2	0.208381	0.1248	0.249028	2.48238	0.551025	1.49755	55.725	7.16045	2.96468	8.44e-05	0.0142295	up regulation in tumor	NS	NS
ENSG00000100625	SIX4	0.538408	0.137726	0.0508929	2.22097	2.54178	1.02707	232.288	29.1684	2.99849	8.97e-05	0.0145504	up regulation in tumor	up regulation in tumor	NS
ENSG00000170775	GPR37	0.54302	0.151768	0.261714	1.73561	5.17639	0.720228	138.938	17.4122	3.00264	0.000131656	0.0193208	up regulation in tumor	up regulation in tumor	S
ENSG00000134775	FHOD3	0.198331	0.153502	0.0567223	1.94528	0.699266	0.637399	157.52	19.6089	3.00662	5.65e-06	0.00174654	up regulation in tumor	up regulation in tumor	S
ENSG00000165238	WNK2	0.0552429	0.0154397	0.012837	0.089276	0.373314	0.208036	53.3343	6.64224	3.02218	0.000264911	0.0339238	up regulation in tumor	up regulation in tumor	NS
ENSG00000039139	DNAH5	0.132764	0.0247373	0.0548459	0.547115	0.295809	0.886738	171.713	21.0809	3.03467	9.59e-06	0.00267841	up regulation in tumor	NS	NS
ENSG00000158113	LRRC43	0.087579	0.0734319	0.142457	0.4246	0.733357	1.32546	41.527	5.07451	3.03838	7.38e-05	0.0129536	up regulation in tumor	down regulation in tumor	S
ENSG00000169126	ARMC4	0.0763771	0.138752	0.141984	0.407319	0.516132	2.02965	84.9353	10.2711	3.0447	6.6e-05	0.0120666	up regulation in tumor	down regulation in tumor	NS
ENSG00000203499	IQANK1	0.353669	0.593078	0.36274	3.68947	5.78327	1.78853	338.072	39.3118	3.10143	1.2e-08	9.67e-06	up regulation in tumor	NS	NS
ENSG00000135744	AGT	0.848649	0.756034	1.08462	4.55157	16.5969	2.48736	326.298	37.1264	3.13618	5.51e-06	0.00174654	up regulation in tumor	up regulation in tumor	NS
ENSG00000159212	CLIC6	4.5175	3.23345	1.38991	3.92246	61.0187	15.7965	1877.94	212.614	3.14302	0.000124642	0.0184259	up regulation in tumor	up regulation in tumor	NS
ENSG00000141934	PLPP2	0.920966	0.534043	0.512019	8.69635	6.75214	2.00351	742.346	83.6704	3.15026	6.84e-08	4.3e-05	up regulation in tumor	NS	NS
ENSG00000132821	VSTM2L	3.00843	3.53665	1.00898	28.9905	34.09	5.8707	813.943	89.1729	3.18977	3.9e-06	0.00132822	up regulation in tumor	up regulation in tumor	NS
ENSG00000078900	TP73	0.0628871	0.0903919	0.0167009	0.104533	0.601823	0.857926	63.7489	6.92715	3.19782	0.000314944	0.0377526	up regulation in tumor	NS	NS
ENSG00000203952	CCDC160	0.101829	0.0853799	0.126199	1.44815	1.04715	0.405179	31.2853	3.3805	3.21126	0.000179706	0.0249171	up regulation in tumor	up regulation in tumor	NS
ENSG00000085552	IGSF9	0.119169	0.222896	0.0852054	0.346653	3.14313	0.500229	159.358	17.0649	3.21988	0.000139216	0.0199924	up regulation in tumor	up regulation in tumor	NS
ENSG00000050030	NEXMIF	0.0614286	0.0429213	0.00951624	0.655198	0.0676818	0.357908	77.2987	8.14379	3.24886	0.000296607	0.037039	up regulation in tumor	NS	NS
ENSG00000104783	KCNN4	0.641809	1.95821	0.894837	20.2946	12.2729	2.37135	717.507	71.7706	3.31958	5.33e-06	0.00172756	up regulation in tumor	up regulation in tumor	NS
ENSG00000123843	C4BPB	0.150998	0.221562	0.245616	1.68376	4.1426	0.434524	121.444	11.9909	3.33788	2.08e-05	0.00502711	up regulation in tumor	up regulation in tumor	NS
ENSG00000183196	CHST6	0.225552	0.059099	0.0393091	2.54926	0.546727	0.258424	174.237	16.8274	3.37748	0.00018203	0.0250665	up regulation in tumor	up regulation in tumor	NS
ENSG00000188761	BCL2L15	0.0945772	0.0925161	0.0366287	0.764213	1.13931	0.436804	108.716	10.3926	3.38607	5.86e-08	3.8e-05	up regulation in tumor	up regulation in tumor	NS
ENSG00000189366	ALG1L	0.0720735	0.302155	0.602927	2.65564	6.92458	1.0447	53.9723	4.96374	3.4358	0.000207381	0.0274302	up regulation in tumor	up regulation in tumor	NS
ENSG00000183317	EPHA10	0.11925	0.0749902	0.0138553	0.491425	1.43871	0.330454	111.046	10.2222	3.44578	2.08e-05	0.00502711	up regulation in tumor	up regulation in tumor	NS
ENSG00000091844	RGS17	0.107686	0.0644934	0.0428972	1.38725	0.677989	0.275454	111.412	10.2372	3.44819	1.71e-06	0.000686625	up regulation in tumor	up regulation in tumor	NS
ENSG00000196754	S100A2	0.426508	0.455142	0.792872	13.7602	2.69993	1.85136	172.906	15.8117	3.45001	1.15e-05	0.00312778	up regulation in tumor	up regulation in tumor	NS
ENSG00000153347	FAM81B	0.243519	0.0612545	0.0905397	1.93623	0.236111	2.11788	64.5012	5.94333	3.45407	0.000155326	0.0218379	up regulation in tumor	down regulation in tumor	NS
ENSG00000101210	EEF1A2	0.0989946	0.487645	0.103517	2.89167	2.83587	1.96247	227.523	20.4196	3.46692	1.36e-07	7.03e-05	up regulation in tumor	up regulation in tumor	NS
ENSG00000146197	SCUBE3	0.206491	0.103881	0.0844502	0.112124	2.03122	2.32404	198.022	17.5009	3.50369	6.96e-05	0.0124867	up regulation in tumor	up regulation in tumor	NS
ENSG00000196090	PTPRT	0.0375542	0.0196799	0.0523595	0.31407	0.0537902	0.872555	96.7431	8.54748	3.50542	0.000106759	0.0162182	up regulation in tumor	down regulation in tumor	NS
ENSG00000183914	DNAH2	0.112835	0.0532169	0.0294973	0.639358	0.749034	0.8328	230.629	20.3041	3.51345	9.66e-11	2.16e-07	up regulation in tumor	up regulation in tumor	NS
ENSG00000155761	SPAG17	0.0954114	0.0266663	0	0.388561	0.196231	0.808097	80.1731	7.02665	3.52536	0.000281353	0.0353538	up regulation in tumor	NS	NS
ENSG00000198807	PAX9	0.120811	0.00844132	0.0655044	1.435	0.372706	0.480709	83.2205	7.08252	3.57115	3.31e-05	0.00740143	up regulation in tumor	up regulation in tumor	NS
ENSG00000124664	SPDEF	0.539647	0.798485	0.413081	10.4037	7.107	3.87049	246.599	20.1976	3.60497	3.38e-11	9.71e-08	up regulation in tumor	up regulation in tumor	S
ENSG00000142273	CBLC	0.0753353	0.568494	0.280095	4.49245	6.10911	0.867163	111.472	8.98025	3.62014	2.02e-05	0.00501062	up regulation in tumor	up regulation in tumor	S
ENSG00000133477	FAM83F	0.0185362	0.0155419	0.0137834	0.079083	0.356179	0.154887	58.2817	4.72669	3.62808	4.4e-06	0.00147453	up regulation in tumor	up regulation in tumor	S
ENSG00000141294	LRRC46	0.236999	0.0722601	0.100131	0.668519	0.398809	4.04152	86.8141	6.95673	3.6528	9.74e-05	0.0151647	up regulation in tumor	down regulation in tumor	NS
ENSG00000179869	ABCA13	0.0987468	0.0186958	0.0207255	0.636265	0.409926	0.738752	205.156	15.8806	3.7039	4.78e-08	3.31e-05	up regulation in tumor	NS	NS
ENSG00000155066	PROM2	0.641351	0.731003	0.642704	14.3226	8.32067	4.26368	983.038	73.6195	3.73846	1.4e-13	1.4e-09	up regulation in tumor	up regulation in tumor	S
ENSG00000277363	SRCIN1	0.0208468	0.126725	0.0920405	0.929836	1.68592	0.662115	230.268	16.8326	3.76433	1.01e-08	8.44e-06	up regulation in tumor	up regulation in tumor	NS
ENSG00000153292	ADGRF1	0.0832905	0.579228	0.241362	1.88602	10.4207	0.355086	946.17	67.5438	3.80669	9.46e-05	0.0149726	up regulation in tumor	down regulation in tumor	NS
ENSG00000136918	WDR38	0.219027	0.110187	0.203584	1.65654	0.386116	5.52786	63.2731	4.45304	3.83761	6.79e-05	0.0122923	up regulation in tumor	up regulation in tumor	NS
ENSG00000127129	EDN2	0.0741403	0.497312	0.137826	6.43408	3.07145	0.790192	101.684	7.00508	3.84131	1.77e-05	0.00449374	up regulation in tumor	up regulation in tumor	NS
ENSG00000161798	AQP5	7.51014	2.89174	6.35147	191.054	3.1536	48.5345	2757.24	190.296	3.85714	5.59e-05	0.0112421	up regulation in tumor	down regulation in tumor	NS
ENSG00000171631	P2RY6	0.657091	0.730325	0.369298	16.1508	8.17593	1.329	614.678	42.0887	3.86768	2.54e-07	0.000122958	up regulation in tumor	up regulation in tumor	S
ENSG00000049283	EPN3	0.0130887	0.09877	0.0486636	0.418814	1.70746	0.390602	70.4021	4.49013	3.94899	9.21e-06	0.00260687	up regulation in tumor	up regulation in tumor	NS
ENSG00000134398	ERN2	0.0121565	0.0509637	0	0.341833	0.267879	0.40424	30.5374	1.901	3.95961	5.48e-05	0.0111268	up regulation in tumor	up regulation in tumor	NS
ENSG00000070182	SPTB	0.160149	0.182482	0.14504	2.60403	4.85739	0.294108	691.47	43.4799	3.99086	2.57e-07	0.000122958	up regulation in tumor	up regulation in tumor	NS
ENSG00000122735	DNAI1	0.0336144	0.0704611	0.0312443	0.244453	0.0740724	1.97762	50.0179	2.94773	4.07513	0.000424726	0.0479726	up regulation in tumor	down regulation in tumor	NS
ENSG00000133055	MYBPH	0	0.0846704	0.0625752	1.01181	1.1868	0.430512	28.596	1.60154	4.11634	6.28e-05	0.0120666	up regulation in tumor	up regulation in tumor	NS
ENSG00000134258	VTCN1	0.040144	0.0336593	0.0746272	0.428177	2.06999	0.154029	48.3766	2.70741	4.16307	9.27e-05	0.0147952	up regulation in tumor	up regulation in tumor	NS
ENSG00000186007	LEMD1	0.138149	0.0694998	0.0513635	3.77752	0.487079	0.353376	61.192	3.43213	4.16419	5.85e-05	0.0116529	up regulation in tumor	up regulation in tumor	NS
ENSG00000198125	MB	0.0560498	0.211481	0.026049	3.09783	2.12439	0.310639	72.2815	3.83533	4.21262	1.91e-05	0.00480695	up regulation in tumor	up regulation in tumor	NS
ENSG00000176920	FUT2	0.287612	0.482304	0.10025	9.13329	6.68637	1.01158	342.808	17.723	4.26965	8.21e-08	4.92e-05	up regulation in tumor	up regulation in tumor	NS
ENSG00000188817	SNTN	0.0914439	0.0219064	0.121424	0.582672	0.115146	3.88732	128.504	6.57982	4.29519	5.93e-05	0.0116846	up regulation in tumor	down regulation in tumor	NS
ENSG00000124143	ARHGAP40	0.0190166	0.143502	0	0.424101	2.69867	0.194573	63.8674	3.12891	4.32476	0.000361543	0.0425077	up regulation in tumor	NS	NS
ENSG00000102109	PCSK1N	2.40714	2.57894	2.52746	39.0305	99.6826	14.8992	1261.65	61.7103	4.3535	8.29e-12	3.34e-08	up regulation in tumor	up regulation in tumor	NS
ENSG00000163885	CFAP100	0.0181259	0.0455937	0.0168479	0.281209	0.0798842	1.39094	35.3888	1.62735	4.42372	0.000266639	0.033929	up regulation in tumor	NS	NS
ENSG00000069011	PITX1	0.0346101	0.116077	0.193019	2.43304	4.91156	0.0737752	156.949	7.2717	4.42769	3.49e-05	0.00766739	up regulation in tumor	up regulation in tumor	S
ENSG00000164749	HNF4G	0.0126421	0.105999	0.0117508	0.404523	2.30665	0.247922	85.6959	3.77619	4.47792	2.4e-05	0.00567568	up regulation in tumor	up regulation in tumor	S
ENSG00000004848	ARX	0.0196183	0.0328985	0.127646	0.0760907	3.30284	0.685826	75.8566	3.3622	4.49577	0.000118935	0.0178447	up regulation in tumor	up regulation in tumor	NS
ENSG00000168658	VWA3B	0.0438844	0.0245303	0.00679838	0.276588	0.0322345	1.3907	85.0722	3.76492	4.50581	7.38e-05	0.0129536	up regulation in tumor	down regulation in tumor	NS
ENSG00000107159	CA9	0	0.213535	0.101451	0.141109	6.28542	0.899607	73.7241	3.16975	4.51915	0.000306534	0.0373647	up regulation in tumor	up regulation in tumor	NS
ENSG00000007062	PROM1	0.0899028	0.0685275	0	1.75139	1.60649	0.404182	168.526	7.09706	4.57176	1.57e-07	7.91e-05	up regulation in tumor	up regulation in tumor	NS
ENSG00000165309	ARMC3	0.0347238	0.021836	0.0161378	0.446121	0.206596	1.10286	74.0414	3.06601	4.60432	1.09e-07	5.94e-05	up regulation in tumor	down regulation in tumor	NS
ENSG00000153086	ACMSD	0.0218161	0.219505	0	3.04614	3.19211	0.111609	106.563	4.04984	4.69493	0.000123504	0.0183929	up regulation in tumor	up regulation in tumor	NS
ENSG00000126778	SIX1	0.223211	0.224585	0	2.11023	8.07644	1.41788	380.684	14.6898	4.69515	1.17e-06	0.00048145	up regulation in tumor	up regulation in tumor	NS
ENSG00000145113	MUC4	0.0341897	0.0334446	0.0238343	1.12439	0.175794	1.10048	308.488	11.7538	4.71381	2.87e-11	9.63e-08	up regulation in tumor	up regulation in tumor	NS
ENSG00000158486	DNAH3	0.00812272	0.0204318	0.00755002	0.271725	0.22553	0.509046	90.7147	3.2547	4.77582	1.18e-10	2.38e-07	up regulation in tumor	down regulation in tumor	NS
ENSG00000112164	GLP1R	0.0391356	0.0492206	0.0181881	1.42302	0.655416	0.867587	55.1209	1.99347	4.77737	1.92e-08	1.48e-05	up regulation in tumor	down regulation in tumor	NS
ENSG00000176029	C11orf16	0.0233057	0.058623	0.043325	1.1299	0.0616276	2.34484	55.5541	1.96766	4.80512	3.91e-05	0.00837347	up regulation in tumor	down regulation in tumor	S
ENSG00000137825	ITPKA	0.203301	0.0730545	0.0809858	3.4075	6.5023	0.321924	128.982	4.50467	4.85228	4.95e-07	0.000226403	up regulation in tumor	up regulation in tumor	NS
ENSG00000198183	BPIFA1	0.168616	0.329883	0	11.9897	3.02203	0.191693	99.0344	3.24719	4.91811	6.54e-05	0.0120666	up regulation in tumor	NS	NS
ENSG00000104140	RHOV	0.0712703	0.0896364	0.264981	8.77651	1.35064	2.85611	133.391	4.3756	4.92919	8.99e-09	7.86e-06	up regulation in tumor	up regulation in tumor	S
ENSG00000154080	CHST9	0.0105473	0.0176871	0.00490184	0.173861	0.0139452	0.894817	75.1598	2.30045	5.0201	3.51e-05	0.00766739	up regulation in tumor	down regulation in tumor	NS
ENSG00000262406	MMP12	0.194529	0.353396	0.0602712	3.33234	2.40052	14.3473	226.753	6.86801	5.03591	1.48e-09	1.75e-06	up regulation in tumor	up regulation in tumor	NS
ENSG00000177459	ERICH5	0.0690039	0.0867859	0.128277	3.04435	5.50445	0.911956	100.393	3.01438	5.05476	3.27e-09	3.54e-06	up regulation in tumor	NS	NS
ENSG00000148735	PLEKHS1	0.0449892	0.188609	0	2.74827	3.2319	1.89881	256.473	7.60401	5.05594	7.82e-10	1.21e-06	up regulation in tumor	NS	NS
ENSG00000167646	DNAAF3	0.0736014	0	0	0.713667	0.12975	1.52183	47.0621	1.46447	5.06416	7.41e-05	0.0129536	up regulation in tumor	NS	NS
ENSG00000230873	STMND1	0.0421637	0.0176764	0.0195955	0.34751	0.483141	1.81551	45.9545	1.37952	5.08281	3.15e-06	0.00111198	up regulation in tumor	NS	NS
ENSG00000179913	B3GNT3	0.10562	0.287816	0.14726	10.2925	8.16931	0.810508	267.22	7.49699	5.14521	1.34e-09	1.68e-06	up regulation in tumor	up regulation in tumor	S
ENSG00000131746	TNS4	0.100281	0.189185	0	5.95574	3.75665	0.630595	302.09	8.45452	5.15159	1.02e-07	5.71e-05	up regulation in tumor	up regulation in tumor	S
ENSG00000204866	IGFL2	0	0.0629967	0.0698361	3.86117	1.12583	0.0213541	73.2157	1.94184	5.21717	0.000107288	0.0162182	up regulation in tumor	up regulation in tumor	NS
ENSG00000184368	MAP7D2	0.0416531	0.0814907	0.0129054	2.61178	1.71335	0.840529	136.214	3.58749	5.22472	5.99e-12	3.01e-08	up regulation in tumor	up regulation in tumor	NS
ENSG00000066248	NGEF	0.0519521	0.02178	0.0241446	2.14092	1.59129	0.155038	109.577	2.75903	5.32677	5.61e-08	3.76e-05	up regulation in tumor	up regulation in tumor	S
ENSG00000125999	BPIFB1	0	0.0657122	0.254962	8.68215	1.81335	2.70635	246.692	5.99217	5.3589	6.02e-09	5.77e-06	up regulation in tumor	NS	NS
ENSG00000154975	CA10	0	0.0228959	0.0253816	0.0132389	0.794289	1.21072	54.1194	1.29456	5.36153	7.49e-05	0.0129572	up regulation in tumor	down regulation in tumor	NS
ENSG00000010282	HHATL	0	0.105728	0	3.56617	0.592784	0.430065	79.9441	1.84186	5.3858	8.77e-06	0.00253885	up regulation in tumor	down regulation in tumor	S
ENSG00000065618	COL17A1	0.12898	0.180241	0.0559466	7.67889	7.11683	0.513211	651.833	15.5483	5.38702	1.3e-10	2.38e-07	up regulation in tumor	up regulation in tumor	NS
ENSG00000086570	FAT2	0.0417954	0.00350439	0.00776971	1.80748	0.338928	0.0641459	193.639	4.64876	5.39961	1.02e-06	0.000426887	up regulation in tumor	up regulation in tumor	NS
ENSG00000119547	ONECUT2	0	0.00313807	0	0.090725	0.0428857	0.0287203	15.8798	0.306977	5.4513	0.000417506	0.0474235	up regulation in tumor	up regulation in tumor	NS
ENSG00000181449	SOX2	0.0725324	0.0608158	0	0.773631	3.43106	2.47377	101.132	2.01928	5.64924	9.54e-10	1.37e-06	up regulation in tumor	up regulation in tumor	NS
ENSG00000152669	CCNO	0	0.25345	0	2.27967	4.52947	6.58659	146.024	2.76279	5.66909	3.52e-09	3.54e-06	up regulation in tumor	up regulation in tumor	NS
ENSG00000047457	CP	0.766137	1.36156	0.108366	18.4023	76.9844	19.3204	5043.04	98.3076	5.68003	3.22e-12	2.16e-08	up regulation in tumor	up regulation in tumor	NS
ENSG00000188910	GJB3	0.0763611	0.064026	0	6.17021	0.874998	0.347247	106.331	2.01928	5.71925	8.7e-07	0.000372212	up regulation in tumor	up regulation in tumor	S
ENSG00000181143	MUC16	0.00277244	0.00116229	0.00128848	0.0752713	0.10508	0.117013	78.5379	1.37952	5.86169	5.48e-11	1.38e-07	up regulation in tumor	up regulation in tumor	S
ENSG00000158125	XDH	0.0301928	0.126578	0.056128	10.5101	0.541132	1.51888	457.276	7.74483	5.87303	1.04e-09	1.39e-06	up regulation in tumor	up regulation in tumor	NS
ENSG00000104313	EYA1	0.00645126	0.0108183	0	0.0437877	0.540206	0.456553	59.0525	0.980071	5.88939	2.16e-06	0.000817105	up regulation in tumor	NS	NS
ENSG00000060718	COL11A1	0.153716	0.078452	0.00621209	6.6424	7.31063	0.290623	780.281	13.0587	5.90425	7.6e-09	6.95e-06	up regulation in tumor	up regulation in tumor	NS
ENSG00000128610	FEZF1	0.0232611	0.0585107	0	3.47344	1.49673	0.119001	80.1011	1.28705	5.92728	2.11e-06	0.000816071	up regulation in tumor	up regulation in tumor	NS
ENSG00000140297	GCNT3	0.00938347	0.0629416	0.0174437	4.84044	0.70303	0.20802	224.408	3.50254	5.97835	2.76e-08	1.98e-05	up regulation in tumor	up regulation in tumor	S
ENSG00000189127	ANKRD34B	0.0452967	0.0759593	0.0140343	8.27186	1.05139	0.154488	229.816	3.28052	6.12069	9.2e-08	5.28e-05	up regulation in tumor	up regulation in tumor	NS
ENSG00000164458	TBXT	0	0.0581324	0	0.0896359	3.64634	0.512335	67.3015	0.92093	6.12503	2.78e-05	0.00642193	up regulation in tumor	NS	NS
ENSG00000144452	ABCA12	0.00645263	0.0108206	0.0119954	1.81445	0.278692	0.0385126	120.948	1.66068	6.17786	3.85e-07	0.000179838	up regulation in tumor	up regulation in tumor	S
ENSG00000204889	KRT40	0	0	0	0.132389	0.673942	0.209548	13.6204	0	6.19641	0.00025239	0.0327374	up regulation in tumor	down regulation in tumor	NS
ENSG00000176381	PRR18	0	0	0	0.0935427	0.272108	0.378379	14.1183	0	6.24941	0.000134799	0.0196386	up regulation in tumor	NS	NS
ENSG00000147689	FAM83A	0.0192363	0.145161	0	7.19978	5.08669	0.442848	484.545	6.25782	6.26704	0.000205995	0.0274274	up regulation in tumor	up regulation in tumor	S
ENSG00000164287	CDC20B	0	0.0113308	0	0.0131035	0.22632	0.806572	28.3383	0.306977	6.29208	0.000259218	0.0334075	up regulation in tumor	down regulation in tumor	NS
ENSG00000234602	MCIDAS	0	0.0243632	0	0.084524	1.0757	1.16443	29.2908	0.306977	6.33981	6.5e-05	0.0120666	up regulation in tumor	NS	NS
ENSG00000136695	IL36RN	0.0184171	0	0	0.214295	1.57465	0.0157032	35.8751	0.366118	6.63066	0.000173849	0.0242724	up regulation in tumor	NS	NS
ENSG00000159763	PIP	0	0.0870827	0	9.36569	0.640821	0.619889	37.4593	0.306977	6.69034	6.12e-05	0.0119417	up regulation in tumor	NS	NS
ENSG00000166105	GLB1L3	0	0.0740373	0.0315674	10.5379	0.407121	3.83397	796.603	5.69222	7.12061	9.8e-06	0.00269948	up regulation in tumor	up regulation in tumor	NS
ENSG00000156284	CLDN8	0	0	0	0.14244	0.0776901	2.15437	29.5896	0	7.31585	4.61e-05	0.00965374	up regulation in tumor	NS	NS
ENSG00000170373	CST1	0.0696766	0	0	0.135122	10.195	4.27747	76.756	0.366118	7.72824	2.19e-06	0.000817105	up regulation in tumor	up regulation in tumor	NS
ENSG00000137648	TMPRSS4	0.0122151	0.0614516	0	43.1367	0.931333	4.50455	2911.69	4.41596	9.35711	6.13e-07	0.000267765	up regulation in tumor	up regulation in tumor	NS
ENSG00000137745	MMP13	0.0214389	0.0179758	0	29.6437	2.68339	0.091399	553.618	0.673095	9.68537	6.74e-06	0.00205239	up regulation in tumor	up regulation in tumor	NS
ENSG00000117983	MUC5B	0.00653382	0	0	4.98916	0.020157	2.9415	891.037	0.732236	10.2868	8.64e-06	0.00253885	up regulation in tumor	up regulation in tumor	NS
S: significant
NS: not significant
